# Supplementary material
Source: publisher figshare collection journal article supplement (https://asha.figshare.com/articles/dataset/_/12735950)
Supplement: Supplementary file 1 [file 2]

## Supplemental Material S2.

### *Metalinguistic Sentence Combining Exercise-Phase Two*

- Combine these 4 sentences into 2 sentences.
- You cannot use “because”
- You must use all the science information in your new sentence, but you can add or change words.
- You must use one of the connector words in the box below

| Similarities | Differences |
|--------------|-------------|
| both         | ,but        |
| like         | ;however,   |

**#1**

**# 2**

|                                             |                                      |
|---------------------------------------------|--------------------------------------|
| Protons are inside the nucleus of an atom.  | Protons have a positive charge       |
| Neutrons are inside the nucleus of an atom. | Electrons have a negative charge.    |
| A proton has a positive charge.             | An electron is a subatomic particle. |
| Neutrons have no electric charge.           | A proton is a subatomic particle.    |
| ↘                                           | ↘                                    |
