# Supplementary material
Source: publisher figshare collection journal article supplement (https://asha.figshare.com/articles/dataset/_/12735950)

## Supplemental Material S1.

### *Metalinguistic Sentence Combining Exercise-Phase One*

- Combine these 2 sentences into 1 sentence.
- You cannot use “because”
- You must use all the science information in your new sentence, but you can add or change words.
- You must use one of the connector words in the box below

| Similarities | Differences |
|--------------|-------------|
| both         | ,but        |
| like         | ;however,   |

---

Physical properties are unique to a particular substance.

Chemical properties are unique to a particular substance.

---

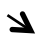

Supplement: Supplementary file 2 [file 2]
